# Cost-effective, high-throughput phenotyping system for 3D reconstruction of fruit form

Mitchell J. Feldmann<sup>1</sup> and Amy Tabb<sup>2</sup>

<sup>1</sup>Department of Plant Sciences, University of California, Davis, Davis, California, United States of America

<sup>2</sup>USDA-ARS-AFRS, Kearneysville, West Virginia, United States of America

Reliable phenotyping methods that are simple to operate and inexpensive to deploy are critical for studying quantitative traits in plants. Traditional fruit shape phenotyping relies on human raters or 2D analyses to assess form, e.g., size and shape. Systems for 3D imaging using multi-view stereo have been implemented, but frequently rely on commercial software and/or specialized hardware, which can lead to limitations in accessibility and scalability. We present a complete system constructed of consumer-grade components for capturing, calibrating, and reconstructing the 3D form of small-to-moderate sized fruits and tubers. Data acquisition and image capture sessions are 9 seconds to capture 60 images. The initial prototype cost was \$1600 USD. We measured accuracy by comparing reconstructed models of 3D printed ground truth objects to the original digital files of those same ground truth objects. The  $R^2$  between length of the primary, secondary, and tertiary axes, volume, and surface area of the ground-truth object and the reconstructed models was  $> 0.97$  and root-mean square error (RMSE) was  $< 3\text{mm}$  for objects without locally concave regions. Measurements from 1mm and 2mm resolution reconstructions were consistent ( $R^2 > 0.99$ ). Qualitative assessments were performed on 48 fruit and tubers, including 18 strawberries, 12 potatoes, 5 grapes, 7 peppers, and 4 Bosch and 2 red Anjou pears. Our proposed phenotyping system is fast, relatively low cost, and has demonstrated accuracy for certain shape classes, and could be used for the 3D analysis of fruit form.

Image Based Phenotyping | 3D Fruit Phenotyping | High-throughput Phenotyping | 3D Model Reconstruction | Camera Calibration | Computer Vision  
Correspondence: [mjfeldmann@ucdavis.edu](mailto:mjfeldmann@ucdavis.edu)

## 1 Introduction

2 Fruit appearance is a key trait for many crops and can condition market viability of fruit products and the success of cultivars (1–3). Taken together, the shape and color, or appearance, of fresh fruit are often associated with quality as they reveal condition and impact consumer perception of taste (1).  
3 Fruit shape is a heritable, complex trait that is difficult to assess due to the complex nature of data acquisition, which can be both time consuming and computationally laborious (4–11). Fruit shape in agricultural studies have primarily been assessed subjectively, placing fruit into qualitative bins ranging from ‘deformed’ to ‘uniform’ or by using 2D geometric morphometrics (4, 7, 12–19).

4 Publicly available methods for 2D phenotyping of plants and plant organs have increased in recent decades to support high quality analysis of leaves, roots, shoots, stems, tubers, and fruits (6, 20–27). Computer vision has shown great potential to quantify external fruit quality and 2D imaging has been

19 successfully implemented to measure the shape and size of  
20 fruits such as strawberries (4, 12), apples (5), carrot (6, 14),  
21 mangoes (28), and many others. More recently, methodolo-  
22 gies for 3D reconstruction of plant organs have been devel-  
23 oped with approaches that vary in speed, scale, cost, and ac-  
24 curacy; including laser scanners, x-ray computed tomogra-  
25 phy, and reconstruction from sequences of 2D images from  
26 digital cameras (8, 29–41). Methods that rely on sequences  
27 of 2D images are numerous and variable with their own com-  
28 plexities and nuances that provide different strengths and  
29 weaknesses (8, 27, 37, 40–44).

30 Modern technologies and analyses can be used to assess these  
31 physical characteristics and ultimately provide researchers  
32 with the tools necessary to support genetic inquiries and bi-  
33 ological discoveries, expand what is known about modern  
34 germplasm, and enhance breeding practices in fruit and veg-  
35 etable crops (4, 6, 8, 45–52). Multivariate and spatial statis-  
36 tics can be used to determine parameters that identify and  
37 quantify fruit defects (53), differentiate between marketable  
38 and non-marketable fruit (12, 50), and understand fruit phe-  
39 notypes that impact markets requiring long shelf-life and sus-  
40 tained fruit quality through harvesting, handling, and ship-  
41 ping.

42 This paper describes a rapid (9 s), low-cost (\$1,600),  
43 turntable-type system for 3D reconstruction of fruit and tu-  
44 bers. Fruit rotates on an automated pedestal while a remote-  
45 controlled digital camera acquires images, as shown in Figure  
46 1. We use a multi-camera calibration method (54) to compute  
47 the calibration parameters of the camera at every time step.  
48 Fruit are segmented from non-fruit regions in the images. Fi-  
49 nally, a reconstruction method using silhouettes as features  
50 (55) reconstructs the fruit or vegetable shape using the cali-  
51 bration and silhouette information (Figure 2).

52 **Contributions.** Our contributions to the state-of-the-art in  
53 fruit phenotyping and estimating 3D reconstructions are a  
54 high-throughput (9 second data acquisition), modular recon-  
55 struction system that can be used in lab or field settings (on  
56 a table) with high accuracy for objects that do not have lo-  
57 cal concavities. Our work is most similar to that of (40) and  
58 (8). In (40), a turntable system is used and the cameras rotate  
59 around the target object, rice inflorescences. Relative cam-  
60 era calibration parameters are estimated by detecting features  
61 and estimating matches from color checkerboard pages and a  
62 structure from motion approach generates point clouds. This  
63 approach works well for the target crop, but has an unknown

64 scale factor that is not solved for. Consequently, the physi-  
65 cal units such as a mm or cm are unknown, and comparison  
66 with another system of a different size may be difficult. In  
67 our system, we calibrate directly from patterns in the scene,  
68 so the physical size of the sample is estimated. The work of  
69 (8) uses a turntable system in the configuration that we do,  
70 where the fruit is rotating and the camera is stationary, to ac-  
71 quire images for 3D reconstruction. They use a commercial  
72 software package to reconstruct point clouds, and then pro-  
73 cess point clouds to extract fruit features. Our work differs  
74 from both of these in that we use silhouettes and directly use  
75 voxel representations instead of point clouds.

## 76 Core Ideas

- 77 • A low-cost 3D fruit phenotyping system is presented.
- 78 • Image capture using the proposed approach lasts for  
79 only 9 seconds.
- 80 • Accuracy is measured against 3D printed ground-truth  
81 objects.
- 82 • Camera calibration, background segmentation, and re-  
83 construction does not rely on commercial software.
- 84 • An RMSE less than 3mm was obtained for ground truth  
85 objects without locally concave regions.

## 86 Materials and Methods

87 The 3D phenotyping system consists of multiple parts: the  
88 physical system for data acquisition and the algorithms for  
89 reconstructing shape from that data. Briefly, one or multiple  
90 digital cameras are mounted on an aluminum frame and re-  
91 motely triggered at a frame rate of 7 frames per second (FPS)  
92 for 9 seconds while a stepper motor controlled by a micro-  
93 controller rotates an object. Captured images are calibrated  
94 using CALICO, a multi-camera calibration method (54) that  
95 relies on a combination of arUco and chArUco markers (56–  
96 58). The fruit foreground is segmented from the non-fruit  
97 background in each calibrated image. Segmented silhouettes  
98 of fruit are then used as features to reconstruct 3D models.

99 **Hardware.** The physical system is composed of an alu-  
100 minium frame, digital cameras and camera control units, a  
101 USB barcode scanner, a microcontroller, and a microcom-  
102 puter.

103 **Frame.** The frame's design is an inverted "T" shape struc-  
104 ture with a 1.22m (4ft) horizontal base and a 1.22m vertical  
105 arm (Figure 1). The main structure is composed entirely of  
106 80/20 t-slotted aluminum. We chose this material because it  
107 is lightweight, strong, and inexpensive. The t-slot design and  
108 the availability of different fasteners provides rigidity while  
109 remaining modular. The arm is connected to the base using a  
110 side-mount and hand brake. The side-mount and hand-brake  
111 combination means that the vertical arm can be positioned  
112 anywhere along the length of the horizontal base. The cam-  
113 era is mounted to the vertical arm using the same side-mount  
114 and hand brakes, again allowing it to be positioned contin-  
115 uously along the vertical span of the arm.

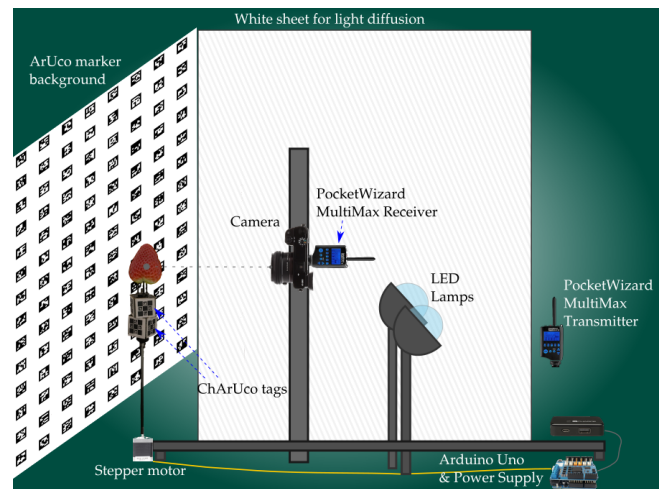

**Fig. 1. Imaging system hardware.** From left to right: the arUco marker backdrop; a stepper motor with a metal pedestal, chArUco tagged cubes, and a target object, a strawberry; the 80/20 t-slotted aluminum inverted T ( $\perp$ ) frame; a digital camera is mounted on the vertical limb of the frame and attached to a PocketWizard MultiMax II radio transceiver; reverse facing LED light sources; Arduino microcontroller connected to stepper motor and power supply. **Best viewed in color.**

116 **Cameras and controllers.** We used one Sony  $\alpha$ 6000 mirror-  
117 less digital camera for this project. The camera was set to  
118 medium speed continuous image capture (7 frames per sec-  
119 ond), manual focus, and aperture priority mode with the aper-  
120 ture set to f/8. We controlled the camera with a PocketWiz-  
121 ard MultiMax II transceiver unit. These units attach to the  
122 camera's multi-port and digitally control the camera's shutter  
123 button and can be programmed to "hold" the shutter button  
124 to allow for variable duration. We used 9 seconds of hold  
125 to match the rotation rate of our stepper motor. Two Pock-  
126 etWizard MultiMax II units are required: one unit to transmit  
127 a signal and one unit to receive a control signal for multiple  
128 cameras. With these, the camera is controlled from a single  
129 source which is triggered by the input of a barcode scanner.

130 **Microcomputers and stepper motor.** The data acquisition  
131 process consists of rotating the fruit on the pedestal and ac-  
132 quiring images of that fruit. To automate this process, we  
133 used a Raspberry Pi 3 microcomputer as well as an Ar-  
134 duino Uno Rev3 microcontroller. To rotate the objects on  
135 the pedestal, we used a Nema 17 stepper motor controlled us-  
136 ing an Arduino Uno Rev3 and an Arduino Rev3 motor shield.  
137 The pedestal is a thin metal rod approximately 20cm in length  
138 and 5mm in diameter. The Nema 17 stepper motor has 200  
139 steps per rotation ( $1.8^\circ$  per step). The motor is programmed  
140 to take 1 step every 45ms, which is a full rotation every 9  
141 seconds.

142 **Lighting.** We used 4 LED lamps to illuminate the scene.  
143 These lights are all directed away from the object towards  
144 a reflective white sheet to reduce the intensity of the light  
145 on the scene. This enabled us to dramatically reduce, and in  
146 some instances eliminate, the glare on the surface of more  
147 reflective objects such as strawberries. The lights chosen do  
148 not have any temperature control and are likely not ideal for  
149 color accurate measurements.

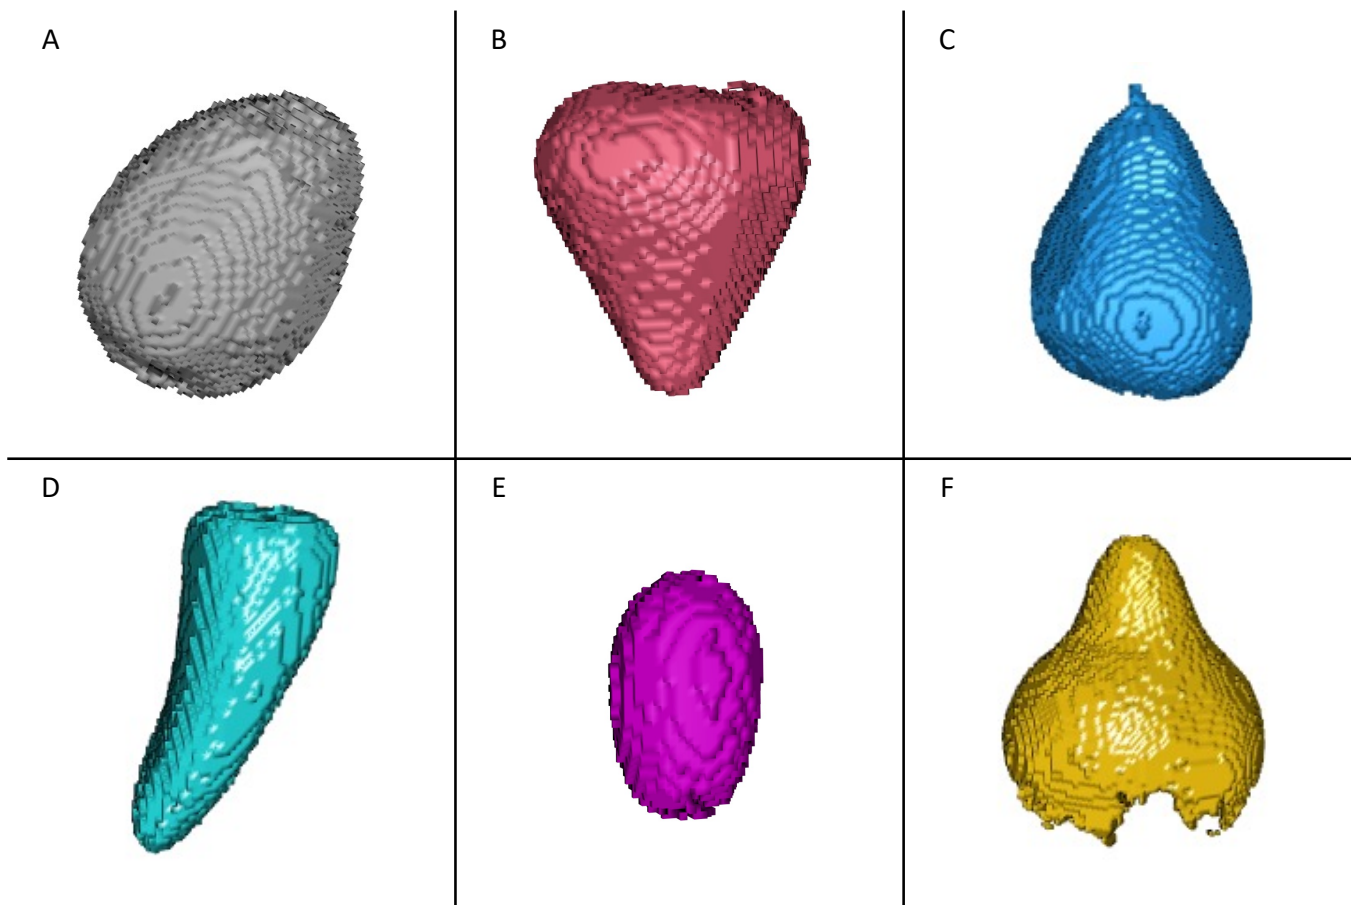

**Fig. 2. Representative model reconstructions of the six types of fruit or tubers imaged in this study.** The resulting 3D reconstructed models from the hardware and software presented in this study, including: (A) a baby yellow potato, (B) a strawberry, (C) a Bosch pear, (D) a sweet mini pepper, (E) a green table grape, and (F) an Anjou pear where the segmentation failed. All models shown are at 1mm resolution. Images are not to scale. **Best viewed in color.**

150 **Calibration Targets.** Calibration is performed on image data  
 151 that also contains the data for reconstruction. To accomplish  
 152 one-step calibration and data acquisition, the workspace is  
 153 prepared with calibration targets, which are shown in Figure  
 154 1. The fruit or tuber is mounted on the pedestal. A pair of  
 155 offset cubes are mounted on the pedestal directly below the  
 156 fruit or tuber (56). Each cube is 2.5cm × 2.5cm × 2.5cm with  
 157 a small hole in the center for mounting onto the pedestal, and  
 158 are rigidly attached.

159 On the cube faces without holes, chArUco markers are  
 160 printed and attached to the cubes. The chArUco patterns  
 161 are a 3×3 checkerboard with each square unit measuring  
 162 6.67mm×6.67mm. The two cubes have eight faces with  
 163 chArUco patterns on them, and multiple cube faces should be  
 164 visible in any frame providing enough information such that  
 165 the calibration method CALICO can compute camera poses.

166 We use a scene background, a 0.71m<sup>2</sup> (26in<sup>2</sup>) aluminum  
 167 panel, composed of arUco markers (57, 58). This type of  
 168 background allows us to refine internal camera calibration  
 169 parameters using the multi-camera calibration method, CAL-  
 170 ICO. Each arUco marker is 2.25cm<sup>2</sup> and adjacent markers  
 171 are separated by 2.75cm of white space. Each image con-  
 172 tains between 60-70 unobscured arUco markers, depending  
 173 on the size of the object.

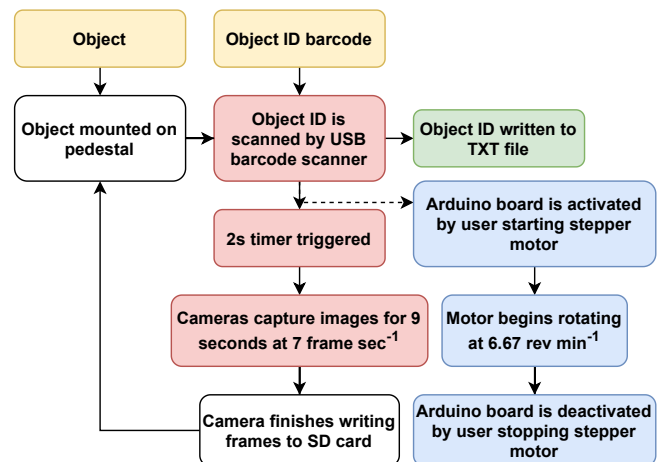

**Fig. 3. Flow diagram of data acquisition strategy and steps.** Input (yellow): A physical object with an associated barcode ID, e.g., QR code or data matrix. Staging (white): The object is placed on the pedestal. Camera Triggering (red): The object ID barcode is scanned using a USB barcode scanner attached to a Raspberry Pi, starting a 2 second timer before triggering the cameras for 9 s at 7 FPS. Intermediate output (green): The scanned barcode is written into a TXT file. Motor control (blue): During the 2 second timer, the Arduino board is activated by supplying power to the board initiating rotation of the object at 6.67 RPM (1 revolution every 9 seconds). Once the image capture is complete, the user deactivate the Arduino board, stopping the motor. Staging (white): The camera will need upwards of 15 seconds to finish writing the images to storage, during which time the next object can be staged on the pedestal, initiating the following session. During this process, the user is responsible for mounting the objects to the pedestal, scanning the barcode ID, and activating/deactivating the stepper motor. **Best viewed in color.**

**Data Acquisition control.** For every object, the Arduino board is first activated by the user, who starts the stepper motor's rotations. The cameras are triggered once the motor begins to rotate using a barcode scanner and a custom python script that sends a serial signal through the general-purpose input output (GPIO) of the Raspberry Pi to the transmitter unit. The cameras stop firing after 9 s and Arduino board is deactivated manually. Including swapping objects, the time for each sample is less than 25 s. In this time period, each camera captures approximately 60 frames during one complete rotation of the object. Following each session, the camera must be allowed to clear its on-board cache and to write the images to an SD card. Depending on the camera and the SD card, write speeds may vary. In our setup, this typically took about 10 s.

**Reconstruction Pipeline.** The 3D reconstruction pipeline consists of three stages: calibration, segmentation, and reconstruction. In this work, the stages consist of independent modules but they have been selected based on the assumptions of the reconstruction module.

We use a Shape from Inconsistent Silhouette method from Tabb (2013) (55) that requires camera calibration information and uses silhouettes – or segmentations – of the target object to generate reconstructions. This reconstruction method tolerates calibrations with small camera calibration error and small image segmentation error. The methods used for calibration and segmentation are discussed in the Calibration and Segmentation sections, respectively.

**Calibration.** The reconstruction method depends on camera calibration. Camera calibration usually means the internal camera parameters as well as the external pose (rotation and translation) of cameras relative to a world coordinate system. In the context of this work, by ‘computing the calibration,’ we mean determining the internal camera parameters as well as the external pose of the camera with respect to the calibration object at each image acquisition.

We use an existing method for multiple-camera calibration, CALICO (54), to compute the desired calibration parameters. To use CALICO in this context, chArUco tags have to be rigidly attached to the pedestal and multiple tags visible at each time instant, which is why the physical system is prepared as in the Hardware section. Some datasets had significant error in the camera pose because not enough chArUco tags were detected in each frame, so we extended the ‘rotation’ option of CALICO to also detect and use the arUco corners within the chArUco boards.

A successful calibration estimates internal camera calibration parameters, selects one of the chArUco boards as a world coordinate system, and estimates the relative pose of the camera at each image acquisition with respect to that world coordinate system. For instance, see Figure 4, which shows an example of an input image, (Figure 4(A)) and the chArUco markers below the pedestal. The reconstructed chArUco board poses, camera poses at each image acquisition, and a reconstructed strawberry are shown in Figure 4(C).

**Segmentation.** The reconstruction method depends on segmented images, where the fruit, tuber, or ground truth object is separated from the image background as in Figures 4A-4B and 6A-6B. The backgrounds consist of arUco tags and the pedestal with chArUco tags. With this background, consisting of dark and light intensities, we took an approach of modelling the actual intensities of the calibration tags per image as a Gaussian Mixture Model with two components, and then used background subtraction to determine the location of target objects.

First, the arUco tags are located in the image. Then, the dark and light regions of each tag are identified using Otsu's segmentation algorithm (59). The dark and light regions of all of the tags are used to estimate six Gaussian distributions (masks are shown in Figure 6C and 6D):  $\mathcal{N}_{d,r}(\mu, \sigma^2)$ ,  $\mathcal{N}_{d,g}(\mu, \sigma^2)$ ,  $\mathcal{N}_{d,b}(\mu, \sigma^2)$ , the distributions representing the dark intensities for red, green, and blue channels, and the same for all three channels of the light intensities.

Each image pixel  $x$  is evaluated against the distributions as in Equation 3. We use a typical background subtraction technique in that we subtract the mean and compare with a threshold; here the threshold is a constant multiplied by the standard deviation. The user provides constants  $k_d$  and  $k_l$ , and from the distributions computes Boolean values  $y_d$  and  $y_l$  for each pixel  $x$ . The segmentation result of whether the pixel represents the background (0) or not (1) is stored in  $z = y_l \wedge y_d$ .

$$y_d = \bigvee_{ch \in \{r, g, b\}} |\mu_{d,ch} - x_{ch}| > k_d \sigma_{d,ch} \quad (1)$$

$$y_l = \bigvee_{ch \in \{r, g, b\}} |\mu_{l,ch} - x_{ch}| > k_l \sigma_{d,ch} \quad (2)$$

$$z = y_l \wedge y_d \quad (3)$$

In our experiments,  $k_d = 2.0$  and  $k_l = 2.5$  for all tests.

**Reconstruction.** We used a Shape from Inconsistent Silhouette (SfIS) method (55) for 3D reconstruction of the plant organs and ground truth objects. With camera calibration and segmentation or silhouette provided, SfIS is a voxel-based method that searches for a labeling of voxels as occupied or empty such that the voxels match the provided segmentations. The match does not need to be exact, so some small camera calibration and segmentation errors can be present.

A key feature of the SfIS method is that it will not reconstruct concavities in 3D space. As examples of these types of shapes, the tetrahedron, sphere, and F ground truth objects (Figure 7A-7C) can all be reconstructed because they do not contain concavities, while the 6-sided spherical die cannot (Figure 7D). The stem or calyx region of an apple is also an example of a locally concave region on a surface. The reason that the SfIS method is not able to reconstruct locally concave regions is because of its dependence on segmentations as features.

We use the extension to SfIS of hierarchical search described in (60); the user specifies an initial voxel size, finds a solution

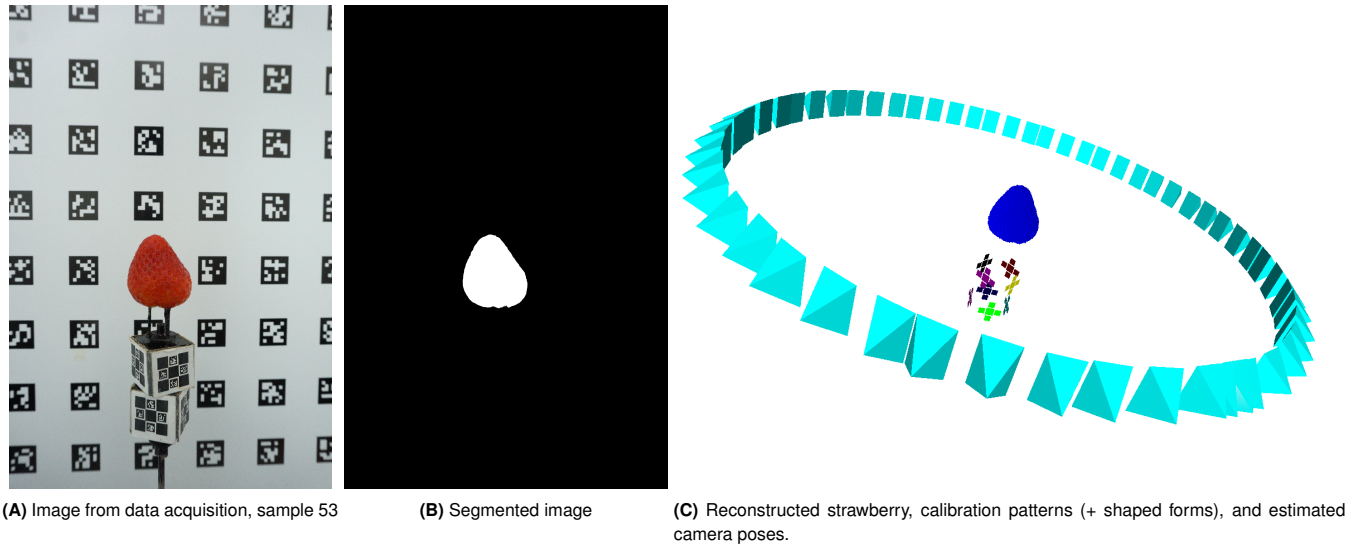

**Fig. 4. An example of successful camera calibration results.** Overview of image data and results. Images of fruit and calibration objects are captured while the pedestal rotates (a). Each image is segmented (b). The calibration and segmentation information is used to reconstruct the fruit shape, 1 mm voxel resolution shown in (c). A camera pose is represented as a pyramid, where the camera center is the tip of pyramid. **Best viewed in color.**

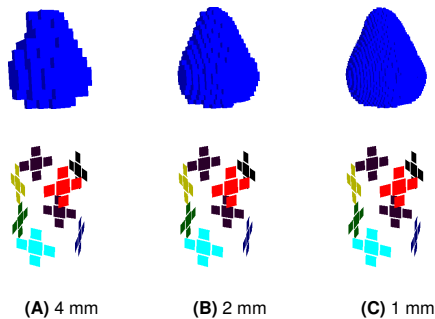

**Fig. 5. Reconstructions of a strawberry at 3 different resolutions.** Strawberry reconstruction from Figure 4 during the hierarchical reconstruction process, with estimated calibration pattern positions below. The SfIS reconstruction method starts at a large voxel resolution (here, 4 mm), and refines the reconstruction at finer resolutions using the prior level's results. **Best viewed in color.**

reconstructed the objects in both experiments at 1mm and 2mm resolution. 295  
296

**Ground Truth Samples.** Fruit form, especially in 3 dimensions, can be difficult to quantify. To assess the accuracy of our system, we selected shapes for which we had 3D model files, printed those files, and then reconstructed the models from image data with the phenotyping system. Through this process we can characterize the performance of our method on reconstructing different shape types with durable objects versus individual fruit measurements, where the fruit decays quickly and the human-made measurement cannot be precisely replicated. 297  
298  
299  
300  
301  
302  
303  
304  
305  
306

A motivation for using 3D printed objects is to have a way to quantitatively assess the performance of the phenotyping system, with a durable artifact that can be stored indefinitely and re-printed and/or scaled if needed. Since we have the originating 3D model file, we can compare the reconstruction and the ground truth object in ways that human-made measurements are unable to, by assessing differences in surface area and volume. This is in contrast to measurements on fruits or tubers that will not persist past a single session and may suffer from measurement error. 307  
308  
309  
310  
311  
312  
313  
314  
315  
316

We identified 4 digital objects from Thingiverse (<https://www.thingiverse.com>) that had good representation of many different shapes that are both common and uncommon in 3D biological structures, such as fruit and tubers: convex regions, saddle regions, and locally concave regions, shown in Figure 7. We scaled these 4 objects prior to printing so that we would have different size representations. We 3D printed these 11 object×scale stereolithography (STL) format files (61–64) using a commercial-grade 3D printer. The 3D printed objects were then imaged in our system and reconstructed from the 2D images. 317  
318  
319  
320  
321  
322  
323  
324  
325  
326  
327

277 with SfIS, divides the voxel size by eight and continues with  
278 search with SfIS, using the previous voxel size's result as an  
279 initial solution. In this work, we performed experiments on  
280 all of the samples with two different parameter sets. In the  
281 first, the initial voxel size is 4 mm, the number of voxel divisions  
282 is two, and the final voxel size is 2 mm. In the second  
283 set of experiments, the initial voxel size is 2 mm, the number  
284 of voxel divisions is two and the final voxel resolution is 1  
285 mm. An additional parameter is the factor that the the input  
286 image is resized down, that value is 4 for both experiments.  
287 The initial image size is 6000 by 4000 pixels.

288 **Experiments.** We focus on two primary experiments. The  
289 first is to quantitatively measure and evaluate our 3D model  
290 reconstructions against objects with a known shape. These  
291 objects with a known shape are the ground truth samples,  
292 with 3D model files that are 3D printed. The second exper-  
293 iment is to qualitatively assess the system's ability to recon-  
294 struct various fruit models across different scales. We recon-

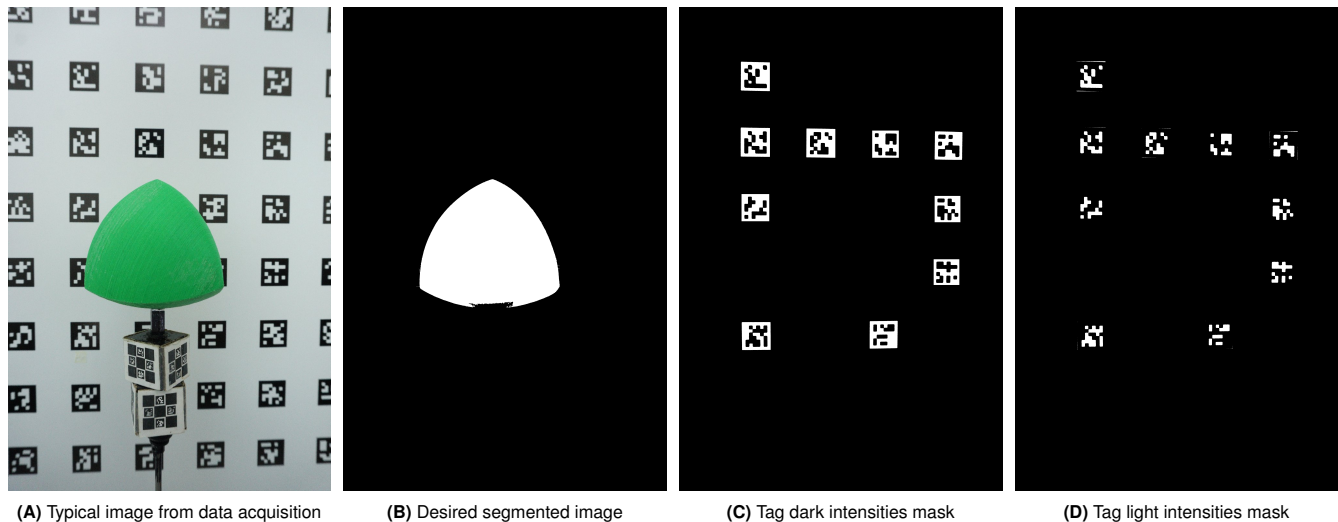

**Fig. 6. An example of successful background segmentation.** Segmentation process from sample 1, one of the 3D printed objects. arUco tags are detected in individual images in the data acquisition step (a). Background subtraction generates the segmented image (b). Individual tags are segmented to separate the dark (c) and light (d) intensities; these regions are used to model the background. Notice a small segmentation error from shadow on the bottom of the tetrahedron. See text for more details. **Best viewed in color.**

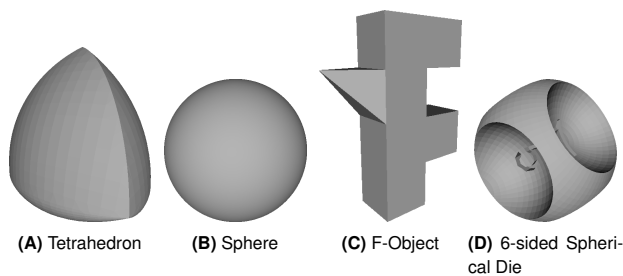

**Fig. 7. Ground truth objects.** The four classes of ground truth objects used in this study. The 3D model files were used to print out physical copies, which were then imaged with our phenotyping system and reconstructed. 7A, 7B, and 7C can all be reconstructed with our system because they do not have locally concave regions, while the depressions in 7D cannot.

$$\delta_X = (X_{R,max} - X_{R,min}) - (X_{G,max} - X_{G,min}) \quad (4)$$

$$\delta_Y = (Y_{R,max} - Y_{R,min}) - (Y_{G,max} - Y_{G,min}) \quad (5)$$

$$\delta_Z = (Z_{R,max} - Z_{R,min}) - (Z_{G,max} - Z_{G,min}) \quad (6)$$

where  $X_{G,min}$  and  $X_{G,max}$  are the minimum and maximum value of the first dimension of the ground-truth object  $G$ , respectively, and  $X_{R,min}$  and  $X_{R,max}$  are the minimum and maximum value of the first axis of the reconstructed object  $R$ , respectively. The *Morpho::meshDist()* function was used to calculate and visualise distances between 3D objects. The distance of the reconstructed model from the ground truth is summarized using root mean square error (RMSE). RMSE is calculated as:

$$RMSE = \left( \frac{1}{n} \sum_{i=1}^n \delta_i^2 \right)^{1/2} \quad (7)$$

where  $\delta_i$  is the distance between  $i$ -th pair of  $n$  corresponding points on the surface of the reconstruction and ground-truth objects. The volume and surface area of models was extracted using *Lithics3D::mesh\_volume()* and *Lithics3D::mesh\_area()*, respectively. The *rgl::shade3d()* function was used to visually compare 3D objects. All regressions were performed using *stats::lm()*.

**Sample Collection.** We purchased fresh fruit and produce from a local grocery store in Davis, CA, USA for qualitative assessment. In total we purchased, scanned, and reconstructed 48 objects; including 18 strawberries, 12 potatoes, 5 grapes, 7 peppers, and 4 Bosch and 2 red Anjuo pears. We want to test our approach for robustness, and so chose fruit and produce with different scales, colors, levels of glossiness, and other features.

**Quantitative Analysis.** Once the ground truth objects are reconstructed, some postprocessing is done to align the reconstructed 3D model with the digital ground truth 3D model files. Specifically, we used R 4.1.0 (65) to perform quantitative comparisons between ground-truth objects and reconstructed models with the packages *Morpho* and *Rvcg* (66), *rgl* (67), *Lithics3D* (68), and *mesheR* (69). The reconstructed models are in Polygon (PLY) file format and were read using *Rvcg::vcgPlyRead()*. STL objects, e.g., the ground-truth objects, were read using *rgl::readSTL()* and converted to mesh3d using *rgl::as.mesh3d()*. The *mesheR::icp()* function was used to perform the iterative closest point algorithm between the reconstruction and the ground-truth triangular meshes, with 100 iterations and allowing for reflection.

For these quantitative analyses, we chose to measure the magnitude of the primary, secondary, and tertiary axes, e.g., X, Y, and Z, the surface area  $SA$ , and the volume  $Vol$ . the difference in magnitude between two models,  $\delta_X$ ,  $\delta_Y$ , and  $\delta_Z$ , are calculated as the difference between the magnitude of the first, second, and third axes of the reconstruction and ground-truth following ICP alignment:

373 **Qualitative Comparisons.** Reconstructed fruit were oriented using principal components analysis (PCA) with the  
374 `stats::prcomp()` function. PCA orientation of the 3D reconstructed models orients results in 3 axes corresponding to the  
375 primary (X), secondary (Y), and tertiary (Z) axes ordered by magnitude, e.g.,  $X \geq Y \geq Z$ . PCA oriented models were  
376 visually inspected using `rgl::shade3d()` functions. Quantitative measurements (Volume, Surface Area, X, Y, and Z) were  
377 measured from the PCA oriented reconstructed models.  
378  
379  
380  
381

## 382 Results

383 **Overall assessment of platform.** Our combination of hardware and software was able to accurately reconstruct  
384 models of fruit (Figure 2) and ground-truth objects (Figures 8 and 9; Table 1). Image acquisition occurs in 9 s sessions  
385 and is buffered by approximately 15 seconds while the cameras finish writing photos to storage and the following object  
386 is staged on the pedestal (Figures 1 and 3). It is possible to achieve about two sessions per minute with current parameters  
387 and hardware.  
388  
389  
390  
391

392 The image calibration, segmentation, and reconstruction steps then proceed remotely following data organization and  
393 storage, which is an important consideration in practice. Using the 1 mm experiment to compute average run times, over  
394 all objects it took on average 27 seconds for calibration, 33.4 seconds for segmentation, and 413 seconds (6:53 minutes)  
395 for reconstruction, for an average total time of 7:53 minutes. All of these run times steps included load and write times of  
396 results and were generated on a workstation with one 12-core 2.70GHz processor and 192 GB of RAM.  
397  
398  
399  
400  
401

402 The calibration, segmentation, and reconstruction steps are automated, and each of those steps are parallelized to some  
403 extent. Once the bounding box size was determined, the whole directory of samples was processed with a program  
404 that called each of the calibration, segmentation, and reconstruction steps, and was not supervised other than starting  
405 the process. Still, with new configurations or objects, or in case of failure, examining the output of each of the steps can  
406 indicate where there are problems, such as in the case of calibration or segmentation, on which the reconstruction step  
407 depends. For instance, in this hardware setup the calibrated camera poses should form a ring as in Figure 4C. Accurate  
408 segmentations may be problematic for some objects, such as in Figure 8(F), the segmentation had false negatives at the  
409 bottom of the pear. Consequently, that part of the fruit is not reconstructed.  
410  
411  
412  
413  
414  
415  
416  
417

418 **Quantitative assessment of ground truth samples.** In general, our approach performed very well on the ground-  
419 truth examples (Table 1) and only failed in ways that are were expected given the assumptions and constraints of our system.  
420 <sup>1</sup> Major deviations between reconstruction and ground-truth in the major axis are typically small (maximum 4.74  
421 mm) and RMSE for the entire surface is  $\leq 2.70$  mm, for  
422  
423  
424

<sup>1</sup>These assumptions are discussed in the Materials and Methods section, 'Reconstruction' subsection.

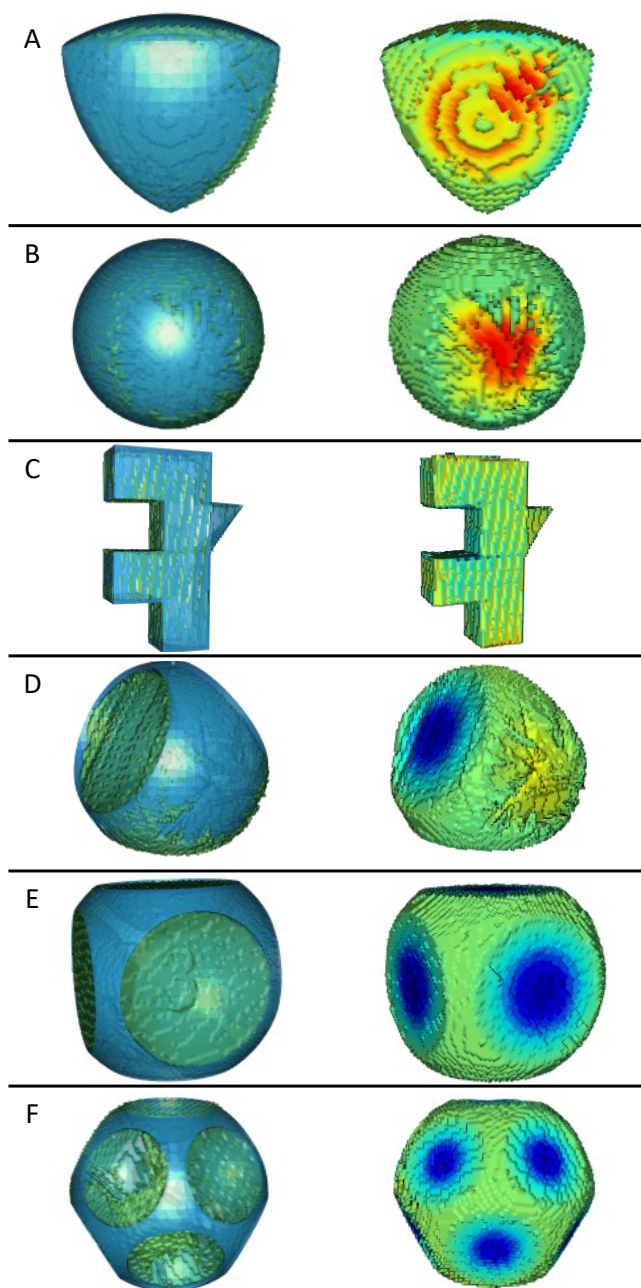

**Fig. 8. Reconstructions of six ground-truth objects.** (Left Column) Reconstructed model (green) overlaid by ground-truth (blue) following ICP alignment. (Right column) Heat map showing difference between reconstructed model and ground-truth object. Red represents regions where the ground-truth is larger than the model. Blue represents regions where the ground-truth is smaller than the model. Teal represents regions where there is no difference between ground-truth and model. (A) A representative tetrahedron (Tetra\_1), (A) a representative sphere (Sphere\_1) (A) the smaller "F" shaped object, (D) the three sided die, (E) the six sided die, and (F) the twelve sided die. Only 1mm resolution models are shown. **Best viewed in color.**

the models without concavities. We found a strong correlation  $R^2 \approx 0.99$  for most measurements between the reconstructed models and the ground-truth objects without concavities (Figure 9). The surface area (SA)  $R^2$  was 0.979 for the models without concavities, and this  $R^2$  value is the lowest value for the traits we examined on objects without concavities. We found that SA of the reconstructed models were upwardly biased relative to the ground-truth objects (110-

**Table 1.** Accuracy metrics, including RMSE, difference in major axis length, and ratios of volume and surface area, from two experiments with eleven ground-truth objects. Differences in mm and ratios are reported between model and ground-truth object. Die\_3, Die\_6, and Die\_12 have local concavities, while the other objects do not.

| Object   | Res <sup>a</sup> | RMSE <sup>b</sup> | $\delta_X^c$ | $\delta_Y^d$ | $\delta_Z^e$ | $\delta_{Vol}^f$ | $\delta_{SA}^g$ |
|----------|------------------|-------------------|--------------|--------------|--------------|------------------|-----------------|
| Tetra_2  | 1                | 0.62              | -0.12        | -0.14        | -0.14        | 0.97             | 1.20            |
|          | 2                | 0.76              | 0.04         | 1.17         | -1.17        | 0.96             | 1.18            |
| Tetra_3  | 1                | 1.17              | 0.61         | 0.21         | -0.93        | 0.96             | 1.24            |
|          | 2                | 1.21              | 1.32         | 0.35         | 0.97         | 0.95             | 1.23            |
| Tetra_4  | 1                | 1.62              | -0.29        | -0.83        | 0.05         | 0.96             | 1.26            |
|          | 2                | 1.69              | 1.51         | 0.31         | 0.06         | 0.95             | 1.25            |
| Sphere_2 | 1                | 0.97              | 0.47         | -0.26        | -0.53        | 0.96             | 1.23            |
|          | 2                | 1.07              | 0.97         | 0.21         | 1.38         | 0.95             | 1.21            |
| Sphere_3 | 1                | 1.54              | -3.27        | -1.01        | -1.25        | 0.96             | 1.27            |
|          | 2                | 1.57              | -4.74        | -1.07        | -1.20        | 0.95             | 1.26            |
| Sphere_4 | 1                | 2.61              | -0.70        | -1.70        | -1.81        | 0.95             | 1.33            |
|          | 2                | 2.70              | 0.33         | -1.19        | -0.90        | 0.94             | 1.33            |
| F_2      | 1                | 0.84              | 0.73         | -0.55        | 0.84         | 0.98             | 1.13            |
|          | 2                | 1.03              | 1.10         | 0.75         | 1.17         | 0.98             | 1.12            |
| F_3      | 1                | 0.66              | 4.66         | 0.82         | 1.93         | 1.01             | 1.16            |
|          | 2                | 0.79              | 4.11         | 1.45         | 2.09         | 1.00             | 1.15            |
| Die_3    | 1                | 7.05              | -3.16        | -9.64        | 5.68         | 1.17             | 1.13            |
|          | 2                | 6.64              | -2.70        | -5.18        | 1.14         | 1.16             | 1.10            |
| Die_6    | 1                | 6.31              | 8.71         | 2.45         | 6.52         | 1.29             | 1.03            |
|          | 2                | 6.00              | 9.77         | 8.25         | 7.97         | 1.28             | 1.03            |
| Die_12   | 1                | 9.34              | 0.28         | -4.21        | 8.61         | 1.20             | 1.02            |
|          | 2                | 8.70              | 0.27         | -2.02        | 9.57         | 1.20             | 1.00            |

<sup>a</sup>Reconstruction resolution in mm.

<sup>b</sup>RMSE of the model surface against the ground-truth surface mm.

<sup>c</sup>Difference between the X axis length of the model and the ground-truth mm.

<sup>d</sup>Difference between the Y axis length of the model and the ground-truth mm.

<sup>e</sup>Difference between the Z axis length of the model and the ground-truth mm.

<sup>f</sup>Ratio of the volume ( $Vol^{1/3}$ ) of the model over the volume of the ground-truth.

<sup>g</sup>Ratio of the surface area ( $SA^{1/2}$ ) of the model over the SA of the ground-truth.

120%). This bias is most likely to do that fact that our models, which are made of voxels (Figure 5), have rough surfaces while the ground-truth objects are perfectly smooth (Figure 8). In general, the size measurement of these objects are very accurate, albeit imperfect, at both 1mm and 2mm resolutions (Figure 9).

We noticed minor segmentation false negative errors from shadows at the lower portion of the object in the images; in the reconstruction, these segmentation errors are realized as jagged portions where the printed object was attached to the pedestal, especially visible in Figure 8(A), (B), and (D). Reconstruction errors, resulting from small segmentation errors, do not have a large impact on the overall accuracy based on the metrics we assessed. However, large segmentation errors over multiple images will affect the reconstruction quality, such as in Figure 2F.

Our approach to reconstruction is unable to recover concavities, as demonstrated by the three spherical die examples (Figure 8D-F). The indexed faces of these models are sunken into the body of the model, resulting in multiple large depressions per die (Figure 7D). As is clearly shown in Figure 8D-F, our reconstructions are more similar to a 3D convex hull, yielding a flat surface over the large concavities in the true models. This is reflected by the rows corresponding to the three die in Table 1. In these cases, the Volume is 115-130% greater than the ground-truth model. In general this is not an issue for types of fruit that do not have concavities.

**Qualitative assessment.** We found that our platform and approach to reconstruction is both quantitatively accurate (Table 1; Figure 9), as well as visually accurate in most cases (Figures 2 and 8). For the peppers, grapes, strawberries, and potatoes, we found no systematic errors in reconstruction. However, the Anjou pears were troublesome to segment leading to the bottom half of the models being severely deformed. The reason for the segmentation error is the use of a general segmentation approach that worked without extensive tuning for the whole set of samples. However, if one were to have a large batch of objects with particular color features, fine tuning the user/session specific parameters for segmentation is important for yielding accurate models. Segmentation errors of this severe type appeared in 3 out of 59 objects that we imaged and the rest of the models appear to reflect the physical objects that were imaged.

## Discussion

We have described a low-cost (\$1,600 USD), high-throughput (9 s data acquisition), modular reconstruction system that can be used in lab settings or in the field on a table, with a fast data acquisition speed of 9 seconds per object. We will discuss several design decisions that lead to flexibility.

The use of consumer grade materials results in a relatively inexpensive system; multiple systems could be built and increase sample throughput during high-volume times of the year. This means that larger experiments can be executed enabling more robust studies. Our system is modular, allowing users with different interests to experiment and explore different cameras, sensors, or lights. This system is easily repaired and replaced if any damages are incurred by the hardware components.

The system has short session times and it only takes 9 seconds to acquire images on a single sample, regardless of the number of cameras. In fact, we found that were frequently rate limited by the write speed from the cameras on board cache to the SD card. More often than not, the next object was prepped around the same time that the cameras had cleared their on-board cache.

This system calibrates the camera from the image data acquired for the samples. The calibration is an absolute (as opposed to relative one, with an unknown scale factor), so the physical units of voxels are known.

**Key assumptions and considerations.** We highlight some key assumptions of the methodologies used in our system that are important for those considering it for a range of objects not treated in this paper.

**Shape classes.** Users who want to accurately represent locally concave shapes — shapes with egg-shaped depressions as demonstrated by the 3, 6, and 12-sided die in our calibration objects (Table 1; Figure 9; Figure 7D)— will need to substitute some portions of this system to recover such features. Shape from Silhouette is not able to recover locally concave regions. However, most of the types of objects we



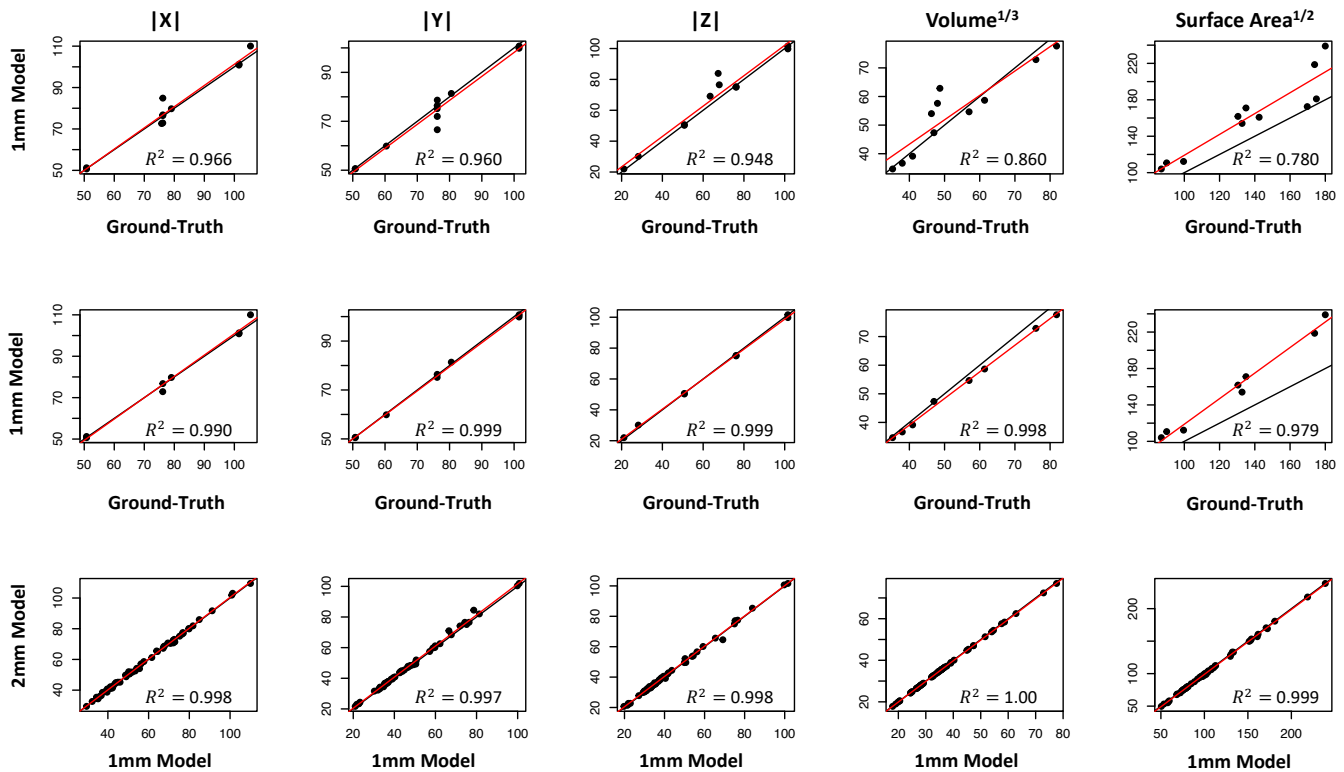

**Fig. 9. Ground-truth calibration experiment results.** *In silico* measurement of reconstructed 3D models and ground-truth objects. Measurements include length of primary (X), secondary (Y), and tertiary (Z) axes, the cube root of the volume ( $Vol^{1/3}$ ), and the square root of the surface area ( $SA^{1/2}$ ). (Top row) All 1mm reconstructed models against ground-truth objects including the three dice, (Middle row) 1mm reconstructed models against ground-truth objects excluding the three dice, and (Bottom row) all reconstructed fruit models in 1mm ( $x$  axis) and 2mm ( $y$  axis). All measurements are reported in mm. The adjusted  $R^2$  from linear regression is reported in the plot. The solid black line is the identity line. The solid red line is the linear regression of  $y$  regressed onto  $x$  identity line.

513 envisioned imaging with this system, fruits and tubers, happen to be mostly non-concave.  
514

515 **Large or fragile objects.** The stepper motor is non-continuous and takes "steps" to provide rotation which causes vibrations through the object. When objects are unbalanced, those vibrations can cause movement of the object out of the center of the scene between different frames. Users should pay close attention to lateral movement of the object during rotation. Similarly, if the larger fruit are of interest, some additional modifications will be required to stabilize the pedestal during rotation. If these issues are a concern, it may be beneficial to construct a multi camera network that surrounds the target (54) or a platform that enables the camera to move easily around a fixed target (40). The same is true for rice panicles or maize tassels, because they are not rigid body objects and the vibrations of the stepper motor are more likely to lead to changes in relative position of parts of the object between frames causing issues during reconstruction. These types of objects are better suited for systems where the cameras move relative to the object or in a multi-camera network (40, 54).  
520  
521  
522  
523  
524  
525  
526  
527  
528  
529  
530  
531  
532

533 **Measurement of chArUco markers.** Third, accuracy is intimately tied to the measurement of the arUco and chArUco markers and any inaccuracies in those measurements will lead to systematic biases in the measurement of the 3D reconstruction. For example, if chArUco markers are declared to  
534  
535  
536  
537

538 be 10mm, when they are really 20mm, all of the models will  
539 2x smaller than the real object than they measured. Users  
540 should print all calibration targets (aruco or chArUco) and  
541 ground-truth samples with a high quality 2D or 3D printer to  
542 ensure sharp corners and well-defined edges. Further, users  
543 are encouraged to verify the proportions of the printed cali-  
544 bration targets with high-precision calipers prior to cali-  
545 bration.

546 **Segmentation quality.** Model quality is directly linked to seg-  
547 mentation quality (Figure 6A and 6B) as we have mentioned  
548 throughout this paper. If an object is only partially seg-  
549 mented, and this false negative error happens in multiple  
550 frames, part of the model may end up distorted or completely  
551 missing (Figure 2F). It is vital, as in any system, that users  
552 examine the quality of reconstructions prior to measurement  
553 and go back to calibration and segmentation outputs to iden-  
554 tify the source of errors. In this work, we chose one set of  
555 segmentation parameters that performed reasonably well for  
556 all objects, but we recommend that users perform segmen-  
557 tation with parameters optimized for their research samples  
558 and imaging conditions.

## 559 Conclusions

560 In conclusion, we presented a phenotyping system for cap-  
561 turing, calibrating, and reconstructing 3D models of small-

562 to-moderately sized fruit and tubers. The low-cost and re-  
563 liance on consumer-grade materials makes it obtainable to  
564 almost any program; short session times allows researchers  
565 to increase the number of samples per hour, and high accu-  
566 racy means that the digital representations will yield abso-  
567 lute measurements on objects that do not degrade over time,  
568 yielding a viable option for research and breeding programs  
569 interested in pursuing 3D fruit phenotyping.

#### 570 DATA AVAILABILITY STATEMENT

571 The input data, including the images and configuration files, is available from Zen-  
572 odo in (70), [10.5281/zenodo.5155765](https://doi.org/10.5281/zenodo.5155765). All 3D model results, at 1 and 2 mm resolu-  
573 tion, are at the same dataset source.  
574 The ground truth objects were modified from objects at Thingiverse.com, and each  
575 had a different license. For this reason, there are four different datasets for the  
576 ground truth objects:

- 577 • Tetrahedra: [10.5281/zenodo.5153992](https://doi.org/10.5281/zenodo.5153992) (61)
- 578 • Spheres: [10.5281/zenodo.5154029](https://doi.org/10.5281/zenodo.5154029) (62),
- 579 • Sphere Dice: [10.5281/zenodo.5155690](https://doi.org/10.5281/zenodo.5155690) (63).
- 580 • F-object: [10.5281/zenodo.5155743](https://doi.org/10.5281/zenodo.5155743) (64)

#### 581 ACKNOWLEDGEMENTS

582 The authors thank Scott Wolford at USDA-ARS-AFRS for 3D printing the ground  
583 truth objects.  
584 Any mention of trade names or commercial products in this publication is solely for  
585 the purpose of providing scientific information and does not constitute recommen-  
586 dation or endorsement by the United States Department of Agriculture. USDA is an  
587 equal opportunity provider and employer.

#### 588 FUNDING STATEMENT

589 This research was supported by awards from the University of California, Davis  
590 Henry A. Jastro Research Scholarship Award program. This research was sup-  
591 ported by USDA-ARS Project 8080-21000-024-00-D.

#### 592 AUTHOR CONTRIBUTIONS

593 **Conceptualization:** MJF, AT **Data curation:** MJF, AT **Formal Analysis:** MJF, AT  
594 **Funding Acquisition:** MJF, AT **Investigation:** MJF, AT **Methodology:** MJF, AT  
595 **Project administration:** MJF, AT **Resources:** MJF, AT **Software:** MJF, AT **Super-  
596 vision:** MJF, AT **Validation:** MJF, AT **Visualization:** MJF, AT **Writing – original  
597 draft preparation:** MJF, AT **Writing – review & editing:** MJF, AT

#### 598 COMPETING FINANCIAL INTERESTS

599 The authors declare no competing interests.

## 600 Bibliography

- 601 1. Corrado Costa, Francesca Antonucci, Federico Pallottino, Jacopo Aguzzi, Da-Wen Sun,  
602 and Paolo Menesatti. Shape analysis of agricultural products: a review of recent research  
603 advances and potential application to computer vision. *Food and Bioprocess Technology*, 4  
604 (5):673–692, 2011.
- 605 2. Amelia Gaston, Sonia Osorio, Béatrice Denoyes, and Christophe Rothan. Applying the  
606 solanaceae strategies to strawberry crop improvement. *Trends in plant science*, 25(2):130–  
607 140, 2020.
- 608 3. Megan M Mathey, Sonali Mookerjee, Kazim Gündüz, James F Hancock, Amy F Iezzoni,  
609 Lise L Mahoney, Thomas M Davis, Nahla V Bassil, Kim E Hummer, Philip J Stewart,  
610 Vance M Whitaker, Daniel J Sargent, Beatrice Denoyes, Iraida Amaya, Eric van de Weg,  
611 and Chad E Finn. Large-Scale Standardized Phenotyping of Strawberry in RosBREED.  
612 *Journal of the American Pomological Society*, page 12, 2013.
- 613 4. Mitchell J Feldmann, Michael A Hardigan, Randi A Famula, Cindy M Lopez, Amy Tabb,  
614 Glenn S Cole, and Steven J Knapp. Multi-dimensional machine learning approaches for  
615 fruit shape phenotyping in strawberry. *GigaScience*, 9(5):giaa030, 2020.
- 616 5. Zoë Migicovsky, Kyle M Gardner, Daniel Money, Jason Sawler, Joshua S Bloom, Peter Mof-  
617 fette, C Thomas Chao, Heidi Schwaninger, Gennaro Fazio, Gan-Yuan Zhong, et al. Genome  
618 to phenome mapping in apple using historical data. *The plant genome*, 9(2), 2016.
- 619 6. Sarah D. Turner, Shelby L. Ellison, Douglas A. Senalik, Philipp W. Simon, Edgar P. Spalding,  
620 and Nathan D. Miller. An Automated Image Analysis Pipeline Enables Genetic Studies of  
621 Shoot and Root Morphology in Carrot (*Daucus carota* L.). *Frontiers in Plant Science*, 9,  
622 November 2018. ISSN 1664-462X. doi: [10.3389/fpls.2018.01703](https://doi.org/10.3389/fpls.2018.01703).
- 623 7. Sofia Visa, Chunxue Cao, Brian McSpadden Gardener, and Esther van der Knaap. Mod-  
624 eling of tomato fruits into nine shape categories using elliptic fourier shape modeling and  
625 Bayesian classification of contour morphometric data. *Euphytica*, 200(3):429–439, Decem-  
626 ber 2014. ISSN 0014-2336, 1573-5060. doi: [10.1007/s10681-014-1179-0](https://doi.org/10.1007/s10681-014-1179-0).
- 627 8. Joe Q He, Richard J Harrison, and Bo Li. A novel 3d imaging system for strawberry pheno-  
628 typing. *Plant Methods*, 13(1):1–8, 2017.
- 629 9. M Minerivini, H Scharr, and S A Tsafaris. Image analysis: The new bottleneck in plant  
630 phenotyping [applications corner]. *IEEE Signal Process. Mag.*, 32(4):126–131, July 2015.
- 631 10. Abbas Atefi, Yufeng Ge, Santosh Pitla, and James Schnable. Robotic technologies for high-  
632 throughput plant phenotyping: Contemporary reviews and future perspectives. *Frontiers in  
633 Plant Science*, 12:1082, 2021.

11. Allan G. White, Peter A. Alspach, Rosemary H. Weskett, and Lester R. Brewer. Heritability  
634 of fruit shape in pears. *Euphytica*, 112(1):1–7, Mar 2000. ISSN 1573-5060. doi: [10.1023/A:  
635 1003761118890](https://doi.org/10.1023/A:1003761118890).
12. T. Ishikawa, A. Hayashi, S. Nagamatsu, Y. Kyutoku, I. Dan, T. Wada, K. Oku, Y. Saeki, T. Uto,  
637 T. Tanabata, S. Isobe, and N. Kochi. Classification of Strawberry Fruit Shape by Machine  
638 Learning. *ISPRS - International Archives of the Photogrammetry, Remote Sensing and  
639 Spatial Information Sciences*, XLII-2:463–470, May 2018. ISSN 2194-9034. doi: [10.5194/  
640 isprs-archives-XLII-2-463-2018](https://doi.org/10.5194/isprs-archives-XLII-2-463-2018).
13. Zoë Migicovsky, Kyle M. Gardner, Daniel Money, Jason Sawler, Joshua S. Bloom, Peter  
642 Mofette, C. Thomas Chao, Heidi Schwaninger, Gennaro Fazio, Gan-Yuan Zhong, and Sean  
643 Myles. Genome to Phenome Mapping in Apple Using Historical Data. *The Plant Genome*,  
644 9(2):0, 2016. ISSN 1940-3372. doi: [10.3835/plantgenome2015.11.0113](https://doi.org/10.3835/plantgenome2015.11.0113).
14. Graham W Horgan. The statistical analysis of plant part appearance—a review. *Computers  
646 and Electronics in Agriculture*, 31(2):169–190, 2001. doi: [10.1016/S0168-1699\(00\)00190-3](https://doi.org/10.1016/S0168-1699(00)00190-3).
15. Graham W Horgan, Mike Talbot, and Jonathan C Davey. Use of statistical image analysis  
648 to discriminate carrot cultivars. *Computers and Electronics in Agriculture*, 31(2):191–199,  
649 2001. doi: [10.1016/S0168-1699\(00\)00191-5](https://doi.org/10.1016/S0168-1699(00)00191-5).
16. Shan Wu, Josh P. Clevenger, Liang Sun, Sofia Visa, Yuji Kamiya, Yusuke Jikumaru, Joshua  
651 Blakeslee, and Esther van der Knaap. The control of tomato fruit elongation orchestrated  
652 by sun, ovate and fs8.1 in a wild relative of tomato. *Plant Science*, 238:95–104, September  
653 2015. ISSN 01689452. doi: [10.1016/j.plantsci.2015.05.019](https://doi.org/10.1016/j.plantsci.2015.05.019).
17. Shan Wu, Biyao Zhang, Neda Keyhaninejad, Gustavo R. Rodriguez, Hyun Jung Kim,  
655 Manohar Chakrabarti, Eudald Illa-Berenguer, Nathan K. Taitano, M. J Gonzalo, Aurora  
656 Diaz, Yupeng Pan, Courtney P. Leisner, Dennis Halterman, C. Robin Buell, Yiqun Weng,  
657 Shelley H. Jansky, Herman van Eck, Johan Willemsen, Antonio J. Monforte, Tea Meulia,  
658 and Esther van der Knaap. A common genetic mechanism underlies morphological diversity  
659 in fruits and other plant organs. *Nature Communications*, 9(1), December 2018. ISSN  
660 2041-1723. doi: [10.1038/s41467-018-07216-8](https://doi.org/10.1038/s41467-018-07216-8).
18. Antonio J. Monforte, Aurora Diaz, Ana Cañal-Delgado, and Esther van der Knaap. The  
662 genetic basis of fruit morphology in horticultural crops: lessons from tomato and melon.  
663 *Journal of Experimental Botany*, 65(16):4625–4637, August 2013. ISSN 1460-2431, 0022-  
664 0957. doi: [10.1093/jxb/eru017](https://doi.org/10.1093/jxb/eru017).
19. Xiong Liao, Mengsi Li, Bin Liu, Miaoling Yan, Xiaomin Yu, Hailing Zi, Renyi Liu, and Chizuko  
666 Yamamuro. Interlinked regulatory loops of ABA catabolism and biosynthesis coordinate  
667 fruit growth and ripening in woodland strawberry. *Proceedings of the National Academy of  
668 Sciences*, 115(49):E11542–E11550, December 2018. ISSN 0027-8424, 1091-6490. doi:  
669 [10.1073/pnas.1812575115](https://doi.org/10.1073/pnas.1812575115).
20. Anand Seethepalli, Larry M York, Hussien Almtarfi, Felix B Fritschi, and Alina Zare. A  
671 novel multi-perspective imaging platform (M-PIP) for phenotyping soybean root crowns in  
672 the field increases throughput and separation ability of genotype root properties. *bioRxiv*,  
673 page 309161, May 2018.
21. Anand Seethepalli, Haichao Guo, Xiuwei Liu, Marcus Griffiths, Hussien Almtarfi, Zenglu  
675 Li, Shuyu Liu, Alina Zare, Felix B Fritschi, Elison B Blancalfor, Xue-Feng Ma, and Larry M  
676 York. RhizoVision crown: An integrated hardware and software platform for root crown  
677 phenotyping. *Plant Phenomics*, 2020:3074916, February 2020.
22. Christopher N Topp, Anjali S Iyer-Pascuzzi, Jill T Anderson, Cheng-Ruei Lee, Paul R Zurek,  
679 Olga Symonova, Ying Zheng, Alexander Bucksch, Yuriy Milekyo, Taras Galkovskiy, Brad T  
680 Moore, John Harer, Herbert Edelsbrunner, Thomas Mitchell-Olds, Joshua S Weitz, and  
681 Philip N Benfey. 3D phenotyping and quantitative trait locus mapping identify core regions  
682 of the rice genome controlling root architecture. *Proc. Natl. Acad. Sci. U. S. A.*, 110(18):  
683 E1695–704, April 2013.
23. Mathilde Balduzzi, Brad M. Binder, Alexander Bucksch, Cynthia Chang, Lilan Hong, Anjali S.  
685 Iyer-Pascuzzi, Christophe Pradal, and Erin E. Sparks. Reshaping Plant Biology: Quantitative  
686 and Quantitative Descriptors for Plant Morphology. *Frontiers in Plant Science*, 08, February  
687 2017. ISSN 1664-462X. doi: [10.3389/fpls.2017.00117](https://doi.org/10.3389/fpls.2017.00117).
24. Jirawat Salungyai, Suriphath Thaitad, Alexander Bucksch, Jitrana Kengkanna, and Patom-  
689 pong Johns Saengwilai. From lab to field: Open tools facilitating the translation of maize  
690 root traits. *Field Crops Research*, 255:107872, 2020.
25. Mao Li, Hong An, Ruthie Angelovici, Clement Bagaza, Albert Batushansky, Lynn Clark,  
692 Viktoriya Coneva, Michael J. Donoghue, Erika Edwards, Diego Fajardo, Hui Fang, Mar-  
693 garet H. Frank, Timothy Gallaher, Sarah Gebken, Theresa Hill, Shelley Jansky, Baljinder  
694 Kaur, Phillip C. Klahs, Laura L. Klein, Vasu Kuraparthy, Jason Londo, Zoë Migicovsky, All-  
695 ison Miller, Rebekah Mohn, Sean Myles, Wagner C. Otoni, J. C. Pires, Edmond Rieffer, Sam  
696 Schmerler, Elizabeth Spriggs, Christopher N. Topp, Allen Van Deynze, Kuang Zhang, Ling-  
697 long Zhu, Braden M. Zink, and Daniel H. Chitwood. Topological Data Analysis as a Morpho-  
698 metric Method: Using Persistent Homology to Delineate a Leaf Morphospace. *Frontiers in  
699 Plant Science*, 9, April 2018. ISSN 1664-462X. doi: [10.3389/fpls.2018.00553](https://doi.org/10.3389/fpls.2018.00553).
- 700 26. Mao Li, Margaret H Frank, Viktoriya Coneva, Washington Mio, Daniel H Chitwood, and  
701 Christopher N Topp. The persistent homology mathematical framework provides enhanced  
702 genotype-to-phenotype associations for plant morphology. *Plant physiology*, 177(4):1382–  
703 1395, 2018.
- 704 27. Cedar Warman, Christopher M Sullivan, Justin Preece, Michaela E Buchanan, Zuzana Ve-  
705 jlupkova, Pankaj Jaiswal, and John E Fowler. A cost-effective maize ear phenotyping plat-  
706 form enables rapid categorization and quantification of kernels. *The Plant Journal*, 106(2):  
707 566–579, 2021.
- 708 28. Sapan Naik, Bankim Patel, and Rashmi Pandey. Shape, size and maturity features extrac-  
709 tion with fuzzy classifier for non-destructive mango (mangifera indica L., cv. kesar) grading.  
710 In *2015 IEEE Technological Innovation in ICT for Agriculture and Rural Development (TIAR)*,  
711 pages 1–7. IEEE, 2015.
- 712 29. Mathieu Gaillard, Chenyong Miao, James C Schnable, and Bedrich Benes. Voxel carving-  
713 based 3d reconstruction of sorghum identifies genetic determinants of light interception  
714 efficiency. *Plant direct*, 4(10):e00255, 2020.
- 715 30. Ayan Chaudhury, Frédéric Boudon, and Christophe Godin. 3d plant phenotyping: All you  
716 need is labelled point cloud data. In *European Conference on Computer Vision*, pages  
717 244–260. Springer, 2020.
- 718 31. Alexander Feldman, Haozhou Wang, Yuya Fukano, Yoichiro Kato, Seishi Ninomiya, and Wei  
719

- 720 Guo. Easydcp: An affordable, high-throughput tool to measure plant phenotypic traits in 3d. *Methods in Ecology and Evolution*, 2021.
- 721
- 722 32. Helin Dutagaci, Pejman Rasti, Gilles Galopin, and David Rousseau. Rose-x: an annotated
- 723 data set for evaluation of 3d plant organ segmentation methods. *Plant methods*, 16(1):1–14,
- 724 2020.
- 725 33. Simon Artzet, Tsu Wei Chen, Jérôme Chopard, Nicolas Brichet, Michael Mielewicz,
- 726 Sarah Cohen-Boulakia, Llorenç Cabrera Bosquet, François Tardieu, Christian Fournier, and
- 727 Christophe Pradal. Phenomenal: An automatic open source library for 3d shoot architecture
- 728 reconstruction and analysis for image-based plant phenotyping. *bioRxiv*, 2020.
- 729 34. Shota Teramoto, Satoko Takayasu, Yuka Kitomi, Yumiko Arai-Sano, Takanari Tanabata,
- 730 and Yusaku Uga. High-throughput three-dimensional visualization of root system architec-
- 731 ture of rice using x-ray computed tomography. *Plant Methods*, 16:1–14, 2020.
- 732 35. Stefan Paulus, Jan Behmann, Anne-Katrin Mahlein, Lutz Plümer, and Heiner Kuhlmann.
- 733 Low-cost 3d systems: suitable tools for plant phenotyping. *Sensors*, 14(2):3001–3018,
- 734 2014.
- 735 36. Lei Li, Qin Zhang, and Danfeng Huang. A review of imaging techniques for plant phenotyp-
- 736 ing. *Sensors*, 14(11):20078–20111, 2014.
- 737 37. Suxing Liu, Carlos Sherard Barrow, Meredith Hanlon, Jonathan P Lynch, and Alexander
- 738 Bucksch. Dirt/3d: 3d phenotyping for maize (zea mays) root architecture in the field. *bioRxiv*,
- 739 2020.
- 740 38. Tyler Dowd, Samuel McInturf, Mao Li, and Christopher N Topp. Rated-m for mesocosm:
- 741 allowing the multimodal analysis of mature root systems in 3d. *Emerging Topics in Life*
- 742 *Sciences*, 5(2):249–260, 2021.
- 743 39. Ni Jiang, Eric Floro, Adam L Bray, Benjamin Laws, Keith E Duncan, and Christopher N
- 744 Topp. Three-dimensional time-lapse analysis reveals multiscale relationships in maize root
- 745 systems with contrasting architectures. *The Plant Cell*, 31(8):1708–1722, 2019.
- 746 40. Jaspreet Sandhu, Feiyu Zhu, Puneet Paul, Tian Gao, Balpreet K Dhatt, Yufeng Ge, Paul
- 747 Staswick, Hongfeng Yu, and Harkamal Walia. Pi-plat: a high-resolution image-based 3d
- 748 reconstruction method to estimate growth dynamics of rice inflorescence traits. *Plant Meth-*
- 749 *ods*, 15(1):1–13, 2019.
- 750 41. Weijuan Hu, Can Zhang, Yuqiang Jiang, Chenglong Huang, Qian Liu, Lizhong Xiong, Wan-
- 751 neng Yang, and Fan Chen. Nondestructive 3d image analysis pipeline to extract rice grain
- 752 traits using x-ray computed tomography. *Plant Phenomics*, 2020, 2020.
- 753 42. Samantha Thi Porter, Morgan Roussel, and Marie Soressi. A simple photogrammetry rig for
- 754 the reliable creation of 3d artifact models in the field: lithic examples from the early
- 755 upper paleolithic sequence of les cottés (france). *Advances in Archaeological Practice*, 4
- 756 (1):71–86, 2016.
- 757 43. Yongjian Wang, Weiliang Wen, Sheng Wu, Chuanyu Wang, Zetao Yu, Xinyu Guo, and Chun-
- 758 jiang Zhao. Maize plant phenotyping: comparing 3d laser scanning, multi-view stereo re-
- 759 construction, and 3d digitizing estimates. *Remote Sensing*, 11(1):63, 2019.
- 760 44. Suxing Liu, Lucia M Acosta-Gamboa, Xiuzhen Huang, and Argelia Lorence. Novel low cost
- 761 3d surface model reconstruction system for plant phenotyping. *Journal of Imaging*, 3(3):39,
- 762 2017.
- 763 45. Christian Peter Klingenberg and Grant S McIntyre. Geometric morphometrics of develop-
- 764 mental instability: analyzing patterns of fluctuating asymmetry with procrustes methods.
- 765 *Evolution*, 52(5):1363–1375, 1998. doi: 10.2307/2411306.
- 766 46. Fred L Bookstein. Landmark methods for forms without landmarks: morphometrics of group
- 767 differences in outline shape. *Medical image analysis*, 1(3):225–243, 1997.
- 768 47. Frank P Kuhl and Charles R Giardina. Elliptic fourier features of a closed contour. *Com-*
- 769 *puter Graphics and Image Processing*, 18(3):236–258, 1982. doi: 10.1016/0146-664X(82)
- 770 90034-X.
- 771 48. Daniel H. Chitwood. Imitation, Genetic Lineages, and Time Influenced the Morphological
- 772 Evolution of the Violin. *PLoS ONE*, 9(10):e109229, October 2014. ISSN 1932-6203. doi:
- 773 10.1371/journal.pone.0109229.
- 774 49. Daniel H. Chitwood and Wagner C. Otoni. Morphometric analysis of Passiflora leaves:
- 775 the relationship between landmarks of the vasculature and elliptical Fourier descriptors of
- 776 the blade. *GigaScience*, 6(1), January 2017. ISSN 2047-217X. doi: 10.1093/gigascience/
- 777 giw008.
- 778 50. Bo Li, Helen M Cockerton, Abigail W Johnson, Amanda Karlström, Eleftheria Stavridou,
- 779 Greg Deakin, and Richard J Harrison. Defining strawberry shape uniformity using 3d imag-
- 780 ing and genetic mapping. *Horticulture research*, 7(1):1–13, 2020.
- 781 51. Joseph L Gage, Elliot Richards, Nicholas Lepak, Nicholas Kaczmar, Chinmay Soman,
- 782 Girish Chowdhary, Michael A Gore, and Edward S Buckler. In-field whole plant maize archi-
- 783 tecture characterized by latent space phenotyping. *bioRxiv*, page 763342, 2019.
- 784 52. Jordan Ubbens, Mikolaj Cieslak, Przemyslaw Prusinkiewicz, Isobel Parkin, Jana Ebers-
- 785 bach, and Ian Stavness. Latent space phenotyping: Automatic image-based phenotyping
- 786 for treatment studies. *bioRxiv*, page 557678, 2019.
- 787 53. Bruce Wang, Timothy Sudijono, Henry Kirveslahti, Tingran Gao, Douglas M Boyer, Sayan
- 788 Mukherjee, and Lorin Crawford. A statistical pipeline for identifying physical features that
- 789 differentiate classes of 3d shapes. *The Annals of Applied Statistics*, 15(2):638–661, 2021.
- 790 54. Amy Tabb, Henry Medeiros, Mitchell J. Feldmann, and Thiago T. Santos. Calibration of asyn-
- 791 chronous camera networks: Calico. *arXiv:1903.06811 [cs]*, March 2019. arXiv: 1903.06811.
- 792 55. A. Tabb. Shape from silhouette probability maps: Reconstruction of thin objects in the pres-
- 793 ence of silhouette extraction and calibration error. In *2013 IEEE Conference on Computer*
- 794 *Vision and Pattern Recognition*, pages 161–168, June 2013. doi: 10.1109/CVPR.2013.28.
- 795 56. Gwon Hwan An, Siyeong Lee, Min-Woo Seo, Kugjin Yun, Won-Sik Cheong, and Suk-Ju
- 796 Kang. Charuco board-based omnidirectional camera calibration method. *Electronics*, 7
- 797 (12):421, 2018.
- 798 57. Sergio Garrido-Jurado, Rafael Munoz-Salinas, Francisco José Madrid-Cuevas, and Rafael
- 799 Medina-Carnicer. Generation of fiducial marker dictionaries using mixed integer linear pro-
- 800 gramming. *Pattern Recognition*, 51:481–491, 2016.
- 801 58. Francisco J Romero-Ramirez, Rafael Muñoz-Salinas, and Rafael Medina-Carnicer.
- 802 Speeded up detection of squared fiducial markers. *Image and vision Computing*, 76:38–
- 803 47, 2018.
- 804 59. Nobuyuki Otsu. A threshold selection method from gray-level histograms. *IEEE Transactions*
- 805 *on Systems, Man, and Cybernetics*, 9(1):62–66, 1979. doi: 10.1109/TSMC.1979.4310076.
60. Amy Tabb. *Shape from inconsistent silhouette: Reconstruction of objects in the presence* 806  
*of segmentation and camera calibration error - ProQuest*. PhD, Purdue University, West 807  
Lafayette, Indiana, USA, December 2014. 808
61. Mitchell J Feldmann and Amy Tabb. Ground truth 3d tetrahedra models, August 2021. 809
62. Mitchell J Feldmann and Amy Tabb. Ground truth 3d sphere models, August 2021. 810
63. Mitchell J Feldmann and Amy Tabb. Ground truth 3d sphere dice models, August 2021. 811
64. Mitchell J Feldmann and Amy Tabb. Ground truth 3d f-object, August 2021. 812
65. R Core Team. *R: A Language and Environment for Statistical Computing*. R Foundation for 813  
Statistical Computing, Vienna, Austria, 2019. 814
66. Stefan Schlager. Morpho and rvog – shape analysis in R. In Guoyan Zheng, Shuo Li, 815  
and Gabor Szekely, editors, *Statistical Shape and Deformation Analysis*, pages 217–256. 816  
Academic Press, 2017. ISBN 9780128104934. 817
67. Duncan Murdoch and Daniel Adler. *rgl: 3D Visualization Using OpenGL*, 2021. R package 818  
version 0.106.8. 819
68. Cornel Pop. *Lithics3D: A toolbox for 3D analysis of archaeological lithics*, 2019. R package 820  
version 0.4.2. 821
69. Stefan Schlager. *mesheR: Meshing Operations on Triangular Meshes*, 2020. R package 822  
version 0.4.200213. 823
70. Mitchell J Feldmann and Amy Tabb. Data and Results for: Cost-effective, high- throughput 824  
fruit phenotyping system for three- dimensional reconstruction of fruit form, August 2021. 825
